# Supplementary material
Source: PubMed Central journal article supplement (PMC8863582)
Supplement: NIHMS1746436-supplement-1.pdf [file NIHMS1746436-supplement-1.pdf]

**Appendix**  
**Human Papillomavirus Vaccine Impact on Cervical Precancers in a Low-Vaccination Population**  
**Shing et al.**

**Appendix Table 1.** Administrative Billing Codes and Beta Coefficients Used to Determine Prediction Scores<sup>a</sup> for CIN2+ Status

| Predictor <sup>b</sup>                                            | Billing codes                                                                                                                                                                                                                            | $\beta$    |
|-------------------------------------------------------------------|------------------------------------------------------------------------------------------------------------------------------------------------------------------------------------------------------------------------------------------|------------|
| 1. Constant                                                       | –                                                                                                                                                                                                                                        | –5.915605  |
| 2. CIN2+ tissue diagnosis                                         | 233.1, 622.12, D06.0, D06.1, D06.7, D06.9, N87.2, N87.1                                                                                                                                                                                  | 5.341873   |
| 3. Non-specific CIN diagnosis                                     | 622.10, N87.9                                                                                                                                                                                                                            | 0.3964537  |
| 4. High-grade squamous intraepithelial lesion diagnosis           | 795.04, R87.613                                                                                                                                                                                                                          | 0.9338596  |
| 5. CIN1 tissue diagnosis                                          | 622.11, N87.1                                                                                                                                                                                                                            | –0.2115674 |
| 6. Low-grade squamous intraepithelial lesion diagnosis            | 795.03, R87.612                                                                                                                                                                                                                          | 0.3541705  |
| 7. Atypical squamous cells of undetermined significance diagnosis | 795.01 795.02, R87.610, R87.611                                                                                                                                                                                                          | 0.2838765  |
| 8. Human papillomavirus screening examination <sup>c</sup>        | V73.81, Z11.51                                                                                                                                                                                                                           | –0.0893877 |
| 9. Papanicolaou smear/test <sup>c</sup>                           | V72.31, V72.32, V76.2, V76.47, 795.06, 91.46, Z01.411, Z01.419, Z01.42, Z12.4, Z12.72, R87.614, 88141-88145, 88147-88148, 88150-88158, 88164-88167, 88174-88175, P3000-P3001, G0101, G0123-G0124, G0141, G0143-G0145, G0147-G0148, Q0091 | –0.1695168 |
| 10. Human papillomavirus DNA test <sup>c</sup>                    | 795.05, 795.09, R87.10, R87.820, 87620-87622, 87623-87625                                                                                                                                                                                | 0.2082338  |
| 11. Cervical treatment procedure                                  | 57511, 57510, 57513, 57530–57531, 57540, 57545, 57550, 57555, 57556, 57520, 57522                                                                                                                                                        | 0.9440706  |
| 12. Cervical or vaginal biopsy                                    | 57421, 57450, 57454, 57455, 57460, 57500, 58110                                                                                                                                                                                          | 0.9414902  |

<sup>a</sup>Prediction scores to determine CIN2+ status were calculated by the following equation:

$$\beta_1 + (\beta_2 * \text{Predictor}_2) + (\beta_3 * \text{Predictor}_3) + (\beta_4 * \text{Predictor}_4) + (\beta_5 * \text{Predictor}_5) + (\beta_6 * \text{Predictor}_6) + (\beta_7 * \text{Predictor}_7) + (\beta_8 * \text{Predictor}_8) + (\beta_9 * \text{Predictor}_9) + (\beta_{10} * \text{Predictor}_{10}) + (\beta_{11} * \text{Predictor}_{11}) + (\beta_{12} * \text{Predictor}_{12}).$$

<sup>b</sup>Predictors were coded as 1 if any of the corresponding billing codes were identified within 60 days from a woman’s cervical diagnostic procedure date; if a woman had a cluster of cervical diagnostic procedures within 30 days of each other, predictor billing codes were searched within –60 days to +60 days from the earliest and latest date, respectively, in the cluster of procedures; predictors were coded as 0 if the search criteria were not met.

<sup>c</sup>Billing codes for a human papillomavirus screening examination, Papanicolaou smear/test, and human papillomavirus DNA test were also used to identify the annual subpopulation of women who were screened for cervical cancer.

CIN, cervical intraepithelial neoplasia.

**Appendix**  
**Human Papillomavirus Vaccine Impact on Cervical Precancers in a Low-Vaccination Population**  
**Shing et al.**

**Appendix Table 2.** Annual Age-Group-Specific Cervical Cancer Screening Proportions<sup>a</sup> Among TennCare-Enrolled Women Aged 18–39 Years, 2008–2018

| Characteristic   | Year    |      |      |      |      |      |      |      |      |      |      |      |
|------------------|---------|------|------|------|------|------|------|------|------|------|------|------|
|                  | Overall | 2008 | 2009 | 2010 | 2011 | 2012 | 2013 | 2014 | 2015 | 2016 | 2017 | 2018 |
|                  | %       | %    | %    | %    | %    | %    | %    | %    | %    | %    | %    | %    |
| Age group, years |         |      |      |      |      |      |      |      |      |      |      |      |
| 18–20            | 27.0    | 46.0 | 45.7 | 44.0 | 37.3 | 30.8 | 26.0 | 20.8 | 17.2 | 15.1 | 14.4 | 12.4 |
| 21–24            | 39.8    | 49.2 | 50.8 | 50.4 | 48.0 | 45.8 | 42.3 | 37.5 | 33.2 | 31.0 | 31.9 | 30.1 |
| 25–29            | 36.5    | 43.6 | 45.1 | 43.8 | 42.0 | 40.7 | 38.1 | 35.2 | 32.0 | 30.7 | 31.3 | 30.5 |
| 30–34            | 31.4    | 34.6 | 37.9 | 37.7 | 36.3 | 35.2 | 33.2 | 31.0 | 28.1 | 27.4 | 27.1 | 26.7 |
| 35–39            | 26.9    | 29.5 | 31.4 | 31.7 | 29.6 | 29.0 | 27.9 | 26.9 | 25.1 | 24.1 | 24.4 | 23.8 |
| Total            | 32.6    | 40.9 | 42.4 | 41.8 | 38.9 | 36.6 | 33.9 | 30.8 | 27.7 | 26.4 | 26.3 | 25.4 |

<sup>a</sup>Percentages represent the proportion of women in each age group who were screened annually, calculated by dividing the number of screened women in each age group by the total number of women in each age group, by year.

TennCare, Tennessee Medicaid.
